# Supplementary material for: Association Between Substance Use and Injury Risk: A 10-Year Nationwide Retrospective Cohort Study
Source: Research Square preprint supplement (doi:10.21203/rs.3.rs-6524963/v1), 2025-06-03
Supplement: Supplementary file 1 [file af08780ba022cb7d899b7529.docx]

**Table S1-1. Years of follow-up**

| **Substance use** | **Min** | **Median** | **Max** | **Mean ± SD** |
| --- | --- | --- | --- | --- |
| Without | 0.01 | 4.91 | 9.99 | 4.90 ± 2.87 |
| With | 0.01 | 4.51 | 9.99 | 4.51 ± 2.82 |

**Table S1-2. Years to injury**

| **Substance use** | **Min** | **Median** | **Max** | **Mean ± SD** |
| --- | --- | --- | --- | --- |
| Without | 0.01 | 1.18 | 9.97 | 1.85 ± 2.04 |
| With | 0.01 | 1.05 | 9.91 | 1.77 ± 1.97 |
